# Supplementary material
Source: publisher site journal article supplement (https://cdn.jamanetwork.com/ama/content_public/journal/cardiology/935934/hoi160068supp1_prod.pdf)
Supplement: Supplementary file 1 [file hoi160068supp1_prod.pdf]

## Supplementary Online Content

Kolek MJ, Graves AJ, Xu M, et al. Evaluation of a prediction model for the development of atrial fibrillation in a repository of electronic medical records. *JAMA Cardiol*. Published online October 12, 2016.  
doi:10.1001/jamacardio.2016.3366

**eTable 1.** Results of 5 Single Imputations of Missing Values

**eTable 2.** Manual Review of 200 Individual Patient Records to Assess the Performance of the Automated Algorithm for Ascertainment of Atrial Fibrillation

This supplementary material has been provided by the authors to give readers additional information about their work.

**eTable 1.** Results of 5 Single Imputations of Missing Values

| Imputation | C-statistic | Lower 95% CI limit | Upper 95% CI limit |
|------------|-------------|--------------------|--------------------|
| 1          | 0.7083      | 0.6989             | 0.7177             |
| 2          | 0.7081      | 0.6987             | 0.7175             |
| 3          | 0.7082      | 0.6989             | 0.7176             |
| 4          | 0.7075      | 0.6982             | 0.7169             |
| 5          | 0.7085      | 0.6991             | 0.7179             |

CI: confidence interval.

**eTable 2.** Manual Review of 200 Individual Patient Records to Assess the Performance of the Automated Algorithm for Ascertainment of Atrial Fibrillation

|                           |     | AF by manual chart review |     |       |
|---------------------------|-----|---------------------------|-----|-------|
|                           |     | Yes                       | No  | Total |
| AF by automated algorithm | Yes | 82                        | 3   | 85    |
|                           | No  | 6                         | 109 | 115   |
| Total                     |     | 88                        | 112 |       |

AF: atrial fibrillation.
